# Supplementary material for: Association of Tumor Volumetry with Postoperative Outcomes for Cervical Paraganglioma
Source: MDPI journal article supplement (doi:10.3390/diagnostics13040744), 2023-02-15
Supplement: s1 [file s1]

Figure S1. STROBE Statement—checklist of items that should be included in reports of observational studies

|                          | Item No | Recommendation                                                                                                                                                                       |                  |
|--------------------------|---------|--------------------------------------------------------------------------------------------------------------------------------------------------------------------------------------|------------------|
| Title and abstract       | 1       | (a) Indicate the study’s design with a commonly used term in the title or the abstract                                                                                               | page 1           |
|                          |         | (b) Provide in the abstract an informative and balanced summary of what was done and what was found                                                                                  | page 1           |
| Introduction             |         |                                                                                                                                                                                      |                  |
| Background/rationale     | 2       | Explain the scientific background and rationale for the investigation being reported                                                                                                 | page 2           |
| Objectives               | 3       | State specific objectives, including any prespecified hypotheses                                                                                                                     | page 2           |
| Methods                  |         |                                                                                                                                                                                      |                  |
| Study design             | 4       | Present key elements of study design early in the paper                                                                                                                              | page 2           |
| Setting                  | 5       | Describe the setting, locations, and relevant dates, including periods of recruitment, exposure, follow-up, and data collection                                                      | page 2           |
| Participants             | 6       | (a) Cohort study—Give the eligibility criteria, and the sources and methods of selection of participants. Describe methods of follow-up                                              | page 2           |
|                          |         | Case-control study—Give the eligibility criteria, and the sources and methods of case ascertainment and control selection. Give the rationale for the choice of cases and controls   |                  |
|                          |         | Cross-sectional study—Give the eligibility criteria, and the sources and methods of selection of participants                                                                        |                  |
|                          |         | (b) Cohort study—For matched studies, give matching criteria and number of exposed and unexposed                                                                                     |                  |
|                          |         | Case-control study—For matched studies, give matching criteria and the number of controls per case                                                                                   |                  |
| Variables                | 7       | Clearly define all outcomes, exposures, predictors, potential confounders, and effect modifiers. Give diagnostic criteria, if applicable                                             | page 4           |
| Data sources/measurement | 8*      | For each variable of interest, give sources of data and details of methods of assessment (measurement). Describe comparability of assessment methods if there is more than one group | page 2 and 3     |
| Bias                     | 9       | Describe any efforts to address potential sources of bias                                                                                                                            | page 3<br>page 8 |

|                        |    |                                                                                                                                                                                                                                                                                                           |        |
|------------------------|----|-----------------------------------------------------------------------------------------------------------------------------------------------------------------------------------------------------------------------------------------------------------------------------------------------------------|--------|
| Study size             | 10 | Explain how the study size was arrived at                                                                                                                                                                                                                                                                 | page 2 |
| Quantitative variables | 11 | Explain how quantitative variables were handled in the analyses. If applicable, describe which groupings were chosen and why                                                                                                                                                                              | page 3 |
| Statistical methods    | 12 | (a) Describe all statistical methods, including those used to control for confounding                                                                                                                                                                                                                     | page 3 |
|                        |    | (b) Describe any methods used to examine subgroups and interactions                                                                                                                                                                                                                                       | n.a.   |
|                        |    | (c) Explain how missing data were addressed                                                                                                                                                                                                                                                               | page 3 |
|                        |    | (d) <i>Cohort study</i> —If applicable, explain how loss to follow-up was addressed<br><i>Case-control study</i> —If applicable, explain how matching of cases and controls was addressed<br><i>Cross-sectional study</i> —If applicable, describe analytical methods taking account of sampling strategy | page 2 |
|                        |    | (e) Describe any sensitivity analyses                                                                                                                                                                                                                                                                     | n.a.   |

Continued on next page

## Results

|                  |     |                                                                                                                                                                                                              |        |
|------------------|-----|--------------------------------------------------------------------------------------------------------------------------------------------------------------------------------------------------------------|--------|
| Participants     | 13* | (a) Report numbers of individuals at each stage of study—eg numbers potentially eligible, examined for eligibility, confirmed eligible, included in the study, completing follow-up, and analysed            | page 4 |
|                  |     | (b) Give reasons for non-participation at each stage                                                                                                                                                         | n.a.   |
|                  |     | (c) Consider use of a flow diagram                                                                                                                                                                           |        |
| Descriptive data | 14* | (a) Give characteristics of study participants (eg demographic, clinical, social) and information on exposures and potential confounders                                                                     | page 4 |
|                  |     | (b) Indicate number of participants with missing data for each variable of interest                                                                                                                          | page 5 |
|                  |     | (c) <i>Cohort study</i> —Summarise follow-up time (eg, average and total amount)                                                                                                                             |        |
| Outcome data     | 15* | <i>Cohort study</i> —Report numbers of outcome events or summary measures over time                                                                                                                          |        |
|                  |     | <i>Case-control study</i> —Report numbers in each exposure category, or summary measures of exposure                                                                                                         |        |
|                  |     | <i>Cross-sectional study</i> —Report numbers of outcome events or summary measures                                                                                                                           | page 5 |
| Main results     | 16  | (a) Give unadjusted estimates and, if applicable, confounder-adjusted estimates and their precision (eg, 95% confidence interval). Make clear which confounders were adjusted for and why they were included | page 5 |
|                  |     | (b) Report category boundaries when continuous variables were categorized                                                                                                                                    | page 6 |
|                  |     | (c) If relevant, consider translating estimates of relative risk into absolute risk for a meaningful time period                                                                                             |        |
| Other analyses   | 17  | Report other analyses done—eg analyses of subgroups and interactions, and sensitivity analyses                                                                                                               | n.a.   |

## Discussion

|                |    |                                                                                                                                                            |        |
|----------------|----|------------------------------------------------------------------------------------------------------------------------------------------------------------|--------|
| Key results    | 18 | Summarise key results with reference to study objectives                                                                                                   | page 7 |
| Limitations    | 19 | Discuss limitations of the study, taking into account sources of potential bias or imprecision. Discuss both direction and magnitude of any potential bias | page 8 |
| Interpretation | 20 | Give a cautious overall interpretation of results considering objectives, limitations, multiplicity                                                        | page 8 |

of analyses, results from similar studies, and  
other relevant evidence

---

|                  |    |                                                                       |        |
|------------------|----|-----------------------------------------------------------------------|--------|
| Generalisability | 21 | Discuss the generalisability (external validity) of the study results | page 8 |
|------------------|----|-----------------------------------------------------------------------|--------|

---

**Other information**

---

|         |    |                                                                                                                                                               |        |
|---------|----|---------------------------------------------------------------------------------------------------------------------------------------------------------------|--------|
| Funding | 22 | Give the source of funding and the role of the funders for the present study and, if applicable, for the original study on which the present article is based | page 8 |
|---------|----|---------------------------------------------------------------------------------------------------------------------------------------------------------------|--------|
